# Supplementary material
Source: publisher figshare collection journal article supplement (https://future-science-group.figshare.com/ndownloader/files/34921731)
Supplement: Supplementary file 1 [file 34921731]

**Supplementary Table 2. Number of tissue-specific CpGs in 28 different cancer types**

| **Cancer type (Abbreviation)** | **Number of tissue-specific CpGs** |
| --- | --- |
| ACC | 133,979 |
| BLCA | 204,954 |
| BRCA | 243,727 |
| CESC | 179,014 |
| CHOL | 70,479 |
| CRAD | 229,486 |
| DLBC | 111,936 |
| ESCC | 86,275 |
| ESST | 226,625 |
| GBM | 176,683 |
| HNSC | 229,768 |
| KICH | 158,392 |
| KIRC | 252,299 |
| KIRP | 217,422 |
| LGG | 260,164 |
| LIHC | 220,845 |
| LUAD | 365,510 |
| LUSC | 204,874 |
| MESO | 134,508 |
| OV | 1,091 |
| PAAD | 185,524 |
| PCPG | 225,603 |
| PRAD | 244,393 |
| SKCM | 214,508 |
| THCA | 273,972 |
| THYM | 227,405 |
| UCEC | 221,295 |
| UVM | 202,806 |
| **Total number** | **394,090** |
